# Supplementary material for: Whole-genome sequencing of Chinese centenarians reveals important genetic variants in aging WGS of centenarian for genetic analysis of aging
Source: Hum Genomics. 2020 Jun 10;14:23. doi: 10.1186/s40246-020-00271-7 (PMC7285530; doi:10.1186/s40246-020-00271-7)
Supplement: Supplementary file 2 — Additional file 2: Supplementary Table 1. Sequencing quality metrics [file 40246_2020_271_MOESM2_ESM.xlsx]

## Sheet: Sheet1
QC metrics of the sequencing data
SAMPLE ID	Depth	Duplication Rate	PCT>1X	PCT>5X	PCT>10X	PCT>20X	PCT>30X
D160805012	32.3852	0.1515	0.9825	0.9793	0.976	0.9476	0.6125
D160805007	29.0643	0.1317	0.9831	0.9808	0.9792	0.976	0.9709
D160805008	33.0675	0.1224	0.9831	0.9808	0.9791	0.9757	0.97
D160805009	30.8997	0.1102	0.9827	0.9799	0.9772	0.9672	0.8634
D160805010	28.7916	0.1785	0.9829	0.9803	0.9782	0.9725	0.9449
D160805011	39.6785	0.1219	0.983	0.9807	0.9789	0.9752	0.9678
D160805013	30.5298	0.1128	0.9831	0.9808	0.9791	0.9758	0.9694
D160805014	32.8343	0.1188	0.9825	0.9796	0.9766	0.9589	0.7087
D160805015	37.9417	0.1368	0.983	0.9808	0.9792	0.9759	0.9701
D160805006	33.7707	0.1908	0.9826	0.9795	0.9764	0.9545	0.6662
D160805001	38.3678	0.13635	0.976147	0.959113	0.930449	0.874712	0.782505
D160805002	35.7656	0.122481	0.978249	0.961525	0.927582	0.857663	0.748719
D160805003	39.5468	0.111384	0.977128	0.962839	0.937187	0.885509	0.797532
D160805004	41.2865	0.103588	0.978935	0.965517	0.94114	0.893388	0.812893
D160805005	43.6959	0.183855	0.979114	0.965688	0.94357	0.902462	0.833022
D160805013	49.7747	0.123119	0.979348	0.96751	0.949668	0.920234	0.870506
D160805014	44.4036	0.117312	0.977769	0.964208	0.943458	0.906106	0.840959
D160805015	42.5242	0.12474	0.977603	0.963892	0.941363	0.898853	0.824994
D160805016	48.0257	0.134064	0.977168	0.964249	0.945273	0.914505	0.861259
